# Supplementary material
Source: publisher figshare collection journal article supplement (https://gsapubs.figshare.com/articles/dataset/_/12533546)
Supplement: Supplementary file 1 [file 1]

## Sheet: Sheet1
Analytical spot	176 Hf/177Hf initial	1σ	176 Lu/177Hf	1σ	176 Yb/177 Hf	1σ	epsilon Hf (today)	U-Pb age (Ma)	176Hf/177Hf initial	epsilon Hf age (Ma)
11AM02M-2	0.283056	1.2e-05	0.00888395	1.3e-05	0.0440948	1.7e-05	10.0788	89.4	0.282717	11.7099
11AM02M-3	0.282793	1e-05	0.00868324	3.4e-05	0.046093	3.6e-05	0.778015	87.8	0.282718	2.37744
11AM02M-4	0.282976	8.8e-06	0.00537801	2.6e-05	0.026102	2.3e-05	7.24968	122.3	0.282696	9.4941
11AM02M-5	0.28213	1.2e-05	0.00564898	4.9e-05	0.0318552	1.4e-05	-22.6685	1124	0.282069	-1.58171
11AM02M-6	0.282783	8.6e-06	0.00419398	5e-05	0.0225538	2.3e-05	0.424372	45	0.282744	1.22644
11AM02M-7	0.282845	1.2e-05	0.0143029	5.8e-05	0.0721913	1.4e-05	2.61696	33.6	0.282751	3.20695
11AM02M-8	0.283015	9.8e-06	0.00594021	4.9e-05	0.033175	1.6e-05	8.62889	76.8	0.282724	10.0246
11AM02M-12	0.282673	1.3e-05	0.00876434	2.6e-05	0.0486463	3.3e-05	-3.4657	58.7	0.282736	-2.409
11AM02M-13	0.282819	1e-05	0.0167046	3.4e-05	0.082826	3.2e-05	1.69749	36.3	0.28275	2.33768
11AM02M-14	0.28266	8.1e-06	0.009251	1.9e-05	0.0537489	1.7e-05	-3.92544	162	0.282762	-3.65957
11AM02M-15	0.283009	1.4e-05	0.011467	1.1e-05	0.0581894	1.1e-05	8.4167	87.1	0.282718	10.0045
11AM02M-16	0.282286	8e-06	0.00248232	1.3e-05	0.0138407	2.6e-05	-17.1517	58.5	0.282736	-16.1004
11AM02M-18	0.282943	1.1e-05	0.00796339	4.9e-05	0.0399929	3.3e-05	6.08266	57.1	0.282737	7.11074
11AM02M-20	0.282931	8.3e-06	0.00591672	2.6e-05	0.0331794	4.6e-05	5.65829	74.4	0.282767	5.76064
11AM02M-21	0.283045	1.3e-05	0.0283057	3.4e-05	0.139839	1.4e-05	9.68982	56.2	0.282737	10.7016
11AM02M-23	0.28291	1.2e-05	0.00474889	1.3e-05	0.0276008	3.6e-05	4.91564	79.1	0.282723	6.35363
11AM02M-24	0.282943	1.5e-05	0.0304918	2.5e-05	0.175304	2.3e-05	6.08266	96.1	0.282712	7.8379
11AM02M-25	0.282636	1.2e-05	0.00666485	1.1e-05	0.0388788	1.4e-05	-4.77418	166	0.282669	-1.71792
11AM02M-26	0.282655	1.2e-05	0.00941455	3.4e-05	0.0509592	1.6e-05	-4.10226	35.4	0.28275	-3.47925
11AM02M-29	0.2829	1.4e-05	0.00823471	1.1e-05	0.0429203	3.3e-05	4.562	45.4	0.282744	5.37191
11AM02M-30	0.283026	7.8e-06	0.00873381	3.9e-05	0.0429922	3.2e-05	9.0179	101.2	0.282709	10.8689
11AM02M-31	0.283038	1.1e-05	0.00857102	4.2e-05	0.0412113	1.7e-05	9.44227	104	0.282708	11.3456
11AM02M-32	0.282947	7.8e-06	0.00323939	2.8e-05	0.0184597	1.1e-05	6.22412	43.7	0.282745	7.00251
11AM02M-33	0.283029	7.9e-06	0.0136745	3e-05	0.0602247	2.6e-05	9.12399	90.7	0.282716	10.7791
11AM02M-34	0.282995	9.9e-06	0.0086461	4.6e-05	0.0455593	3.9e-05	7.9216	54.1	0.282738	8.89398
11AM02M-35	0.283051	8.9e-06	0.0081889	2.1e-05	0.0368093	4e-05	9.90201	51.2	0.28274	10.8205
11AM02M-36	0.282581	1.4e-05	0.0179602	2.2e-05	0.0885157	2e-05	-6.71922	86.9	0.282718	-5.13797
11AM02M-37	0.282633	1.4e-05	0.00758271	2.5e-05	0.0388715	2.2e-05	-4.88027	48.7	0.282742	-4.00986
11AM02M-40	0.282789	1.3e-05	0.0123441	1.5e-05	0.0607861	1.6e-05	0.636557	88.7	0.282717	2.25273
11AM02M-49	0.282475	8.8e-06	0.0043403	8.1e-05	0.0229887	3.3e-05	-10.4678	762.5	0.282297	3.78632
11AM15M-1	0.28274	8.8e-06	0.0144654	1.2e-05	0.0795681	0.000029	-1.09629	69	0.282729	0.152532
11AM15M-2	0.282721	1.3e-05	0.0110842	1.9e-05	0.0478916	0.000027	-1.76822	78	0.282724	-0.351849
11AM15M-3	0.28283	7.7e-06	0.00444356	4.2e-05	0.024197	0.000055	2.08649	37	0.282749	2.73975
11AM15M-7	0.282635	9.4e-06	0.00911914	2.8e-05	0.0446291	0.000009	-4.80955	538	0.282437	5.21796
11AM15M-8	0.282405	1.1e-05	0.00758642	3e-05	0.0463903	0.000030	-12.9433	515	0.282452	-3.35778
11AM15M-9	0.281578	9.5e-06	0.00163695	4.6e-05	0.0107887	0.000025	-42.1896	40	0.282747	-11.4842
11AM15M-10	0.282701	9.7e-06	0.0187025	2.1e-05	0.10883	0.000034	-2.4755	156	0.282675	0.39496
11AM15M-11	0.282609	8.6e-06	0.00850088	2.2e-05	0.0533759	0.000019	-5.72902	603	0.282397	5.52152
11AM15M-12	0.282738	1.2e-05	0.00980475	2.5e-05	0.0623802	0.000043	-1.16702	78	0.282724	0.249445
11AM15M-13	0.282827	7.8e-06	0.00556229	1.5e-05	0.0298088	0.000030	1.9804	701	0.282335	15.0919
11AM15M-14	0.282608	8.7e-06	0.00572105	8.1e-05	0.0287336	0.000012	-5.76438	45	0.282744	-4.9629
11AM15M-15	0.282742	1.3e-05	0.00848505	2.1e-05	0.0481015	0.000027	-1.02556	26	0.282756	-0.577265
11AM15M-16	0.28276	1.4e-05	0.00989881	3.6e-05	0.0541472	0.000044	-0.389007	43	0.282745	0.375747
11AM15M-17	0.282743	6.9e-06	0.00735415	1.9e-05	0.0397394	0.000028	-0.990201	41	0.282747	-0.262731
11AM15M-18	0.282595	8.6e-06	0.00775454	2e-05	0.0468389	0.000020	-6.22412	51	0.28274	-5.31105
11AM15M-19	0.282929	1.3e-05	0.0117679	2e-05	0.0695764	0.000011	5.58756	140	0.282685	8.16196
11AM15M-20	0.282604	1.6e-05	0.00902759	1.8e-05	0.0547876	0.000014	-5.90584	417	0.282513	1.84657
11AM15M-21	0.28617	1.1e-05	0.000818242	1.7e-05	0.00547533	0.000021	120.203	41	0.282747	19.9412
11AM15M-22	0.282687	1.5e-05	0.0123016	2.6e-05	0.0675392	0.000029	-2.9706	39	0.282748	-2.28052
11AM15M-23	0.282682	9.9e-06	0.00827345	1.5e-05	0.0460033	0.000029	-3.14742	48	0.282742	-2.28986
11AM22M- 1	0.282945	8.4e-06	0.0124615	2e-05	0.0642281	0.000041	6.15339	48	0.282742	7.0119
11AM22M- 2	0.282613	7.6e-06	0.00761131	1.5e-05	0.0427817	0.000030	-5.58756	111	0.282703	-3.55713
11AM22M- 3	0.282647	7.6e-06	0.00460125	3.2e-05	0.0262638	0.000027	-4.38517	106	0.282706	-2.44764
11AM22M- 4	0.28146	1.3e-05	0.0073445	4.6e-05	0.045147	0.000019	-46.3626	1621	0.281753	-15.8454
11AM22M- 5	0.282314	6.1e-06	0.00610312	2.4e-05	0.0351043	0.000016	-16.1615	112	0.282703	-14.115
11AM22M- 6	0.282554	7.8e-06	0.00631669	1.8e-05	0.0346702	0.000010	-7.67405	109	0.282704	-5.68139
11AM22M- 7	0.282338	6.1e-06	0.00493817	1.7e-05	0.0279269	0.000018	-15.3127	109	0.282704	-13.3219
11AM22M- 8	0.282264	9e-06	0.00589345	3.6e-05	0.0378433	0.000027	-17.9297	95	0.282713	-16.1999
11AM22M- 9	0.283022	1.1e-05	0.00539457	2.3e-05	0.0268054	0.000033	8.87644	91	0.282716	10.5371
11AM22M- 10	0.282359	5.6e-06	0.00464879	1.4e-05	0.0267697	0.000021	-14.5701	166	0.282669	-11.5174
11AM22M- 11	0.281091	1.2e-05	0.00702389	1.6e-05	0.0396161	4.3e-05	-59.412	2604	0.28112	-9.87757
11AM22M- 12	0.282368	9.1e-06	0.005897	3.3e-05	0.0365985	2.9e-05	-14.2518	429	0.282505	-6.28204
11AM22M- 13	0.282956	1e-05	0.00645538	1.8e-05	0.0377612	2.4e-05	6.5424	67	0.28273	7.75507
11AM22M- 14	0.282696	8.4e-06	0.00780887	4.7e-05	0.0449284	2e-05	-2.65232	163	0.282671	0.34871
11AM22M- 15	0.282624	7.7e-06	0.00677596	2.6e-05	0.0369702	1.5e-05	-5.19855	61	0.282734	-4.09926
11AM22M- 16	0.282554	6.5e-06	0.00469923	1.7e-05	0.0268773	3.2e-05	-7.67405	102	0.282709	-5.81178
11AM22M- 17	0.282786	9.7e-06	0.0134551	2e-05	0.0712878	4.6e-05	0.530465	47	0.282743	1.36978
11AM22M- 18	0.282304	1.1e-05	0.0104116	1.3e-05	0.0603225	2.7e-05	-16.5151	96	0.282713	-14.7664
11AM22M- 19	0.282353	7.2e-06	0.00497499	2.3e-05	0.0292859	1.8e-05	-14.7823	98	0.282711	-12.996
11AM22M- 20	0.281306	2.3e-05	2.02657	1.1e-05	0.0125243	3e-05	-51.8087	653	0.282365	-10.6815
11AM22M- 21	0.281897	9.1e-06	0.00878197	1.5e-05	0.0543162	8.1e-05	-30.9084	1272	0.281975	-7.02257
11AM22M- 22	0.282265	6.9e-06	0.00751188	1.7e-05	0.0425676	2.1e-05	-17.8943	102	0.282709	-16.0343
11AM22M- 23	0.28229	7.7e-06	0.00322287	2.9e-05	0.0180843	3.6e-05	-17.0102	108	0.282705	-15.0384
11AM22M- 24	0.282314	8e-06	0.0046753	3e-05	0.0268691	1.9e-05	-16.1615	102	0.282709	-14.3011
11AM22M- 25	0.282255	9.7e-06	0.00861494	5.5e-05	0.0488048	2e-05	-18.248	106	0.282706	-16.3136
11AM22M- 26	0.282643	1.1e-05	0.0116864	9e-06	0.0659063	2.2e-05	-4.52663	128	0.282693	-2.17906
11AM22M- 27	0.282905	1.4e-05	0.0132348	3.9e-05	0.0712289	1.8e-05	4.73882	126	0.282694	7.05162
11AM22M- 28	0.282399	1.2e-05	0.00803913	1.9e-05	0.0431345	1.7e-05	-13.1555	107	0.282706	-11.2014
11AM22M- 29	0.282709	6.3e-06	0.00390429	4.1e-05	0.022573	2.6e-05	-2.19259	81	0.282722	-0.720407
11AM27M-77	0.282871	1.7e-05	0.00477629	2.7e-05	0.0221622	1.6e-05	3.53643	77	0.282724	4.93504
11AM27M-78	0.282504	1.6e-05	0.00519025	3.3e-05	0.0277868	1.8e-05	-9.44227	93	0.282714	-7.74796
11AM27M-79	0.282361	7.8e-06	0.00537963	2.1e-05	0.0316266	2.7e-05	-14.4994	107	0.282706	-12.5455
11AM27M-80	0.282624	1.4e-05	0.0150494	4.3e-05	0.078825	3.3e-05	-5.19855	59	0.282735	-4.13648
11AM27M-81	0.282848	2.3e-05	0.00792259	3.1e-05	0.0487574	2.1e-05	2.72305	59	0.282735	3.78612
11AM27M-82	0.282837	1.4e-05	0.0212503	2.9e-05	0.116546	3.8e-05	2.33404	70	0.282729	3.60201
11AM27M-83	0.282895	1.2e-05	0.0211557	2.5e-05	0.121801	3.1e-05	4.38517	51	0.28274	5.29939
11AM27M-63	0.282858	1.1e-05	0.00966845	4.2e-05	0.0546621	2e-05	3.07669	86	0.282719	4.643
11AM27M-64	0.282864	9.3e-06	0.00632212	2.8e-05	0.0329257	1.5e-05	3.28888	86	0.282719	4.85522
11AM27M-67	0.282404	1.4e-05	0.0105224	3e-05	0.0602529	3.3e-05	-12.9787	47	0.282743	-12.1407
11AM27M-69	0.28299	8.4e-06	0.00521593	4.6e-05	0.028157	4.6e-05	7.74478	89	0.282717	9.36791
11AM27M-70	0.282833	9.8e-06	0.0117043	2.1e-05	0.0686772	1.4e-05	2.19259	94	0.282714	3.90787
11AM27M-71	0.282232	1.3e-05	0.00494694	2.2e-05	0.0347511	1.8e-05	-19.0614	566	0.28242	-8.52444
11AM27M-72	0.2829	1.4e-05	0.00994916	2.5e-05	0.0559542	1.7e-05	4.562	81	0.282722	6.03535
11AM27M-73	0.282924	9.1e-06	0.00870403	1.5e-05	0.054428	3.6e-05	5.41074	50	0.282741	6.30643
11AM27M-74	0.282703	8.1e-06	0.0104931	8.1e-05	0.0678454	2.3e-05	-2.40477	90	0.282716	-0.764956
11AM27M-75	0.282834	5.6e-06	0.0128504	2.1e-05	0.0734728	1.4e-05	2.22795	93	0.282714	3.92459
11AM27M-76	0.282769	1.7e-05	0.0266884	3.6e-05	0.150865	1.6e-05	-0.0707286	62	0.282734	1.04786
11AM27M-60	0.282884	1.2e-05	0.0147821	1.7e-05	0.0831141	2.6e-05	3.99617	69	0.282729	5.24574
11AM27M-59	0.282743	1.3e-05	0.0144131	2.6e-05	0.0881727	3.9e-05	-0.990201	52	0.28274	-0.0579464
11AM27M-58	0.282862	6.1e-06	0.00749049	1.5e-05	0.0383367	4.2e-05	3.21815	94	0.282714	4.93364
11AM27M-57	0.282982	1.6e-05	0.015336	1.2e-05	0.0856052	2.5e-05	7.46187	143	0.282683	10.0929
11AM27M-56	0.282597	1.3e-05	0.0194254	1.9e-05	0.115611	3.4e-05	-6.15339	63	0.282733	-5.01699
11AM27M-55	0.282839	7.1e-06	0.00501743	4.3e-05	0.0274497	1.9e-05	2.40477	89	0.282717	4.02688
11AM27M-52	0.282959	7.7e-06	0.00608041	2.9e-05	0.03431	4.3e-05	6.64849	79	0.282723	8.08491
11AM27M-50	0.282627	1e-05	0.00825857	2.4e-05	0.0463249	3e-05	-5.09246	74	0.282726	-3.75113
11AM27M-47	0.2827	1.1e-05	0.0169771	2e-05	0.0911764	1.2e-05	-2.51087	95	0.282713	-0.777904
11AM27M-46	0.282878	1.2e-05	0.00949642	1.5e-05	0.0561446	2.7e-05	3.78398	46	0.282744	4.60499
11AM32M-2	0.282661	1e-05	0.006556	1.4e-05	0.0351681	1.4e-05	-3.89007	219.8	0.282636	0.171128
11AM32M-5	0.282633	9.3e-06	0.0130764	1.8e-05	0.0771332	2.7e-05	-4.88027	37.3	0.282749	-4.22198
11AM32M-6	0.282654	9.6e-06	0.0107875	1.7e-05	0.0629145	1.6e-05	-4.13762	37.8	0.282749	-3.46997
11AM32M-7	0.282734	9e-06	0.0207053	3.6e-05	0.116044	1.6e-05	-1.30848	37.9	0.282749	-0.638737
11AM32M-8	0.28746	1.1e-05	0.0138728	2.3e-05	0.0871239	1.6e-05	165.823	42.1	0.282746	16.586
11AM32M-9	0.282741	1.4e-05	0.0118196	1.4e-05	0.0524079	1.8e-05	-1.06093	57.3	0.282737	-0.0299962
11AM32M-13	0.282682	8.5e-07	0.0137424	1.6e-05	0.0765198	2.7e-05	-3.14742	40.3	0.282747	-2.43317
11AM32M-14	0.28283	8.2e-06	0.00964038	3.3e-05	0.0570589	3.3e-05	2.08649	40.4	0.282747	2.80306
11AM32M-15	0.282703	7.3e-06	0.0104286	3.2e-05	0.0617101	2.1e-05	-2.40477	33.2	0.282751	-1.82258
11AM32M-16	0.282833	7.9e-06	0.0131518	4.7e-05	0.0730035	4e-05	2.19259	34.4	0.282751	2.79744
11AM32M-17	0.282817	1.4e-05	0.0150532	1.1e-05	0.0931066	3.1e-05	1.62676	39.1	0.282748	2.31908
11AM32M-19	0.282486	9.2e-06	0.00761811	2.6e-05	0.0484782	3.8e-05	-10.0788	556.1	0.282426	0.282962
11AM32M-23	0.282421	8.1e-06	0.00873399	3.9e-05	0.0538178	1.8e-05	-12.3775	526.6	0.282444	-2.57328
11AM32M-24	0.282766	6.4e-06	0.0064454	4.2e-05	0.0388248	2.9e-05	-0.176822	43.8	0.282745	0.602845
11AM32M-25	0.282756	1.1e-05	0.00946311	4.6e-05	0.0543362	1.8e-05	-0.530465	33.5	0.282751	0.0574413
11AM32M-26	0.282809	1.8e-05	0.018209	2.1e-05	0.107771	2.9e-05	1.34384	38.4	0.282748	2.02311
11AM32M-27	0.282754	9.1e-06	0.0156167	2.2e-05	0.0922115	2.6e-05	-0.601193	37.9	0.282749	0.0686049
11AM32M-29	0.282899	1e-05	0.00922079	2.5e-05	0.0553216	1.8e-05	4.52663	36.7	0.282749	5.17449
11AM32M-30	0.282669	1e-05	0.00888997	1.5e-05	0.0478763	2e-05	-3.60716	29.9	0.282753	-3.08645
11AM32M-32	0.282778	1.1e-05	0.00626956	8.1e-05	0.0365065	2.4e-05	0.24755	74.2	0.282726	1.59345
11AM32M-33	0.282765	6.6e-06	0.00384099	2.1e-05	0.0229657	1.6e-05	-0.212186	85.1	0.282719	1.33674
11AM32M-35	0.282619	9.3e-06	0.0120898	3.6e-05	0.07172	3.3e-05	-5.37537	37.3	0.282749	-4.71712
11AM32M-36	0.282854	1.8e-05	0.00814241	1.9e-05	0.0510343	3.2e-05	2.93524	42.8	0.282745	3.69657
11AM32M-37	0.282825	8.2e-06	0.00417095	2e-05	0.0261527	4.7e-05	1.90967	39	0.282748	2.60015
11AM32M-38	0.283003	8.2e-06	0.00736617	2.2e-05	0.0445024	1.1e-05	8.20452	66.8	0.282731	9.4137
11AM32M-39	0.282769	2.5e-05	0.011441	1.7e-05	0.0713088	1.1e-05	-0.0707286	58	0.282736	0.973362
11AM52M- 1	0.281438	1.9e-05	0.015346	3.6e-05	0.091618	2.1e-05	-47.1406	0	0.282772	-17.1758
11AM52M- 2	0.282862	1.5e-05	0.0130214	2.3e-05	0.0621122	2.9e-05	3.21815	24	0.282757	3.62944
11AM52M- 3	0.282699	1.5e-05	0.00634296	1.4e-05	0.0342608	2.8e-05	-2.54623	82	0.282721	-1.05548
11AM52M- 4	0.282828	9.6e-06	0.014503	1.6e-05	0.075287	2.1e-05	2.01577	314	0.282577	7.84305
11AM52M- 5	0.282757	2.5e-05	0.0109018	3.3e-05	0.0615553	1.9e-05	-0.4951	79	0.282723	0.940111
11AM52M- 6	0.282767	1.1e-05	0.0219885	1.8e-05	0.108425	2.8e-05	-0.141457	42	0.282746	0.604702
11AM52C- 1	0.282923	8e-06	0.00921218	4.7e-05	0.0387531	3.2e-05	5.37537	80	0.282722	6.83023
11AM52C- 2	0.282827	8.2e-06	0.00890738	2.6e-05	0.0479465	4.4e-05	1.9804	82	0.282721	3.47195
11AM52C- 3	0.282785	1.2e-05	0.0204418	1.7e-05	0.100654	4.1e-05	0.4951	44	0.282745	1.27855
11AM52C- 4	0.282653	2e-05	0.0116116	2e-05	0.0568038	3e-05	-4.17299	82	0.282721	-2.68253
11AM71C-1	0.282058	0.00025	0.0220235	1.5e-05	0.0128272	4.3e-05	-25.2147	495	0.282464	-16.0183
11AM71C-2	0.282745	1.5e-05	0.00816455	1.7e-05	0.0424721	3.1e-05	-0.919472	50	0.282741	-0.0244477
11AM71C-4	0.282731	2.1e-05	0.0057082	2.9e-05	0.0296953	2.9e-05	-1.41457	83	0.282721	0.0950052
11AM71C-5	0.282848	1.1e-05	0.0105235	3e-05	0.0604597	2.5e-05	2.72305	51	0.28274	3.63709
11AM71C-7	0.282619	0.00028	0.00802022	5.5e-05	0.0600613	2.1e-05	-5.37537	117	0.282699	-3.23308
11AM71C-8	0.282672	2.5e-05	0.0188663	9e-06	0.0115107	1.1e-05	-3.50107	266	0.282607	1.42406
11AM91M-1	0.282672	1.2e-05	0.00461651	1.5e-05	0.000278155	2.9e-05	-3.50107	49	0.282742	-2.62493
11AM91M-3	0.282834	6e-06	0.00536725	3.3e-05	0.0339253	2.8e-05	2.22795	128	0.282693	4.57739
11AM91M-4	0.282708	7.1e-06	0.00881798	4.6e-05	0.0513483	2.1e-05	-2.22795	43	0.282745	-1.46336
11AM91M-5	0.282637	1.3e-05	0.0139989	1.4e-05	0.0796345	1.9e-05	-4.73882	57	0.282737	-3.71392
11AM91M-14	0.28237	1.2e-05	0.0103553	1.8e-05	0.0649662	2.8e-05	-14.1811	724	0.282321	-0.660396
11AM91M-15	0.281461	2.6e-05	0.00343454	1.7e-05	0.0232159	3.2e-05	-46.3272	1476	0.281845	-18.5898
11AM91M-16	0.282473	2.3e-05	0.0084969	3.6e-05	0.0540482	4.4e-05	-10.5386	160	0.282673	-7.59626
11AM91M-17	0.282569	1.6e-05	0.00767622	2.3e-05	0.0497346	4.1e-05	-7.14359	155	0.282676	-4.29336
11AM91M-18	0.28262	1.5e-05	0.0125252	1.4e-05	0.0786076	3e-05	-5.34001	160	0.282673	-2.3959
11AM91M-21	0.2826	8e-06	0.0108224	1.6e-05	0.0625391	2.7e-05	-6.0473	160	0.282673	-3.10343
11AM91M-22	0.282675	1.3e-05	0.014036	3.3e-05	0.0781246	1.9e-05	-3.39497	57	0.282737	-2.36991
11AM91M-24	0.282522	2e-05	0.00686833	3.2e-05	0.0438367	1.6e-05	-8.80571	100	0.28271	-6.98093
11AM91M-26	0.282544	1.6e-05	0.00903391	4.7e-05	0.0567256	1e-05	-8.0277	196	0.28265	-4.41284
11AM91M-27	0.282512	2.9e-05	0.00702697	1.1e-05	0.041154	1.8e-05	-9.15936	123	0.282696	-6.90624
11AM91M-28	0.282695	1.3e-05	0.01016	2.6e-05	0.0657486	2.7e-05	-2.68769	40	0.282747	-1.97897
11AM91M-29	0.282584	8.2e-06	0.00600148	3.9e-05	0.0374563	3.3e-05	-6.61313	171	0.282666	-3.46425
11AM91M-34	0.282579	1.5e-05	0.00700403	3e-05	0.0432973	3.1e-05	-6.78995	164	0.28267	-3.77172
11AM91M-35	0.282617	1.2e-05	0.00946747	4.6e-05	0.0597863	2.9e-05	-5.4461	166	0.282669	-2.39009
11AM91M-36	0.282738	7.3e-06	0.0074081	2.1e-05	0.0460363	2.5e-05	-1.16702	130	0.282691	1.21878
11AM91M-31	0.282696	7.1e-06	0.00658906	2.2e-05	0.0375346	2.1e-05	-2.65232	124	0.282695	-0.378826
11AM91M-32	0.282728	7.4e-06	0.00374208	2.5e-05	0.0241596	1.1e-05	-1.52067	79	0.282723	-0.0856282
11AM91M-39	0.28262	1.9e-05	0.0162029	1.5e-05	0.101092	2.8e-05	-5.34001	58	0.282736	-4.29657
11AM91M-38	0.282017	1.6e-05	0.00680827	8.1e-05	0.044358	3.2e-05	-26.6647	949	0.282179	-8.91099
11AM91M-37	0.282767	1.2e-05	0.0120594	2.1e-05	0.0689916	4.4e-05	-0.141457	77	0.282724	1.25655
11AM91M-54	0.282332	1.8e-05	0.00555935	3.6e-05	0.0357142	4.1e-05	-15.5249	168	0.282668	-12.4353
11AM91M-53	0.282702	1.7e-05	0.00823353	1.9e-05	0.0533775	3.5e-05	-2.44014	79	0.282723	-1.00526
11AM111M-1	0.282645	4.8e-06	0.0126831	4.3e-05	0.0738067	4.6e-05	-4.4559	174.6	0.282664	-1.23903
11AM111M-8	0.282716	1.5e-05	0.00956317	2.9e-05	0.0565232	2.1e-05	-1.94504	63.1	0.282733	-0.806213
11AM111M-9	0.280376	1.1e-05	0.00549467	2.4e-05	0.0344172	2.2e-05	-84.6975	2802.2	0.280991	-11.4263
11AM111M-13	0.282807	2.2e-05	0.00971682	2e-05	0.0554962	2.5e-05	1.27311	257.3	0.282612	6.0382
11AM111M-15	0.282664	9.7e-06	0.00671964	1.5e-05	0.0375886	1.5e-05	-3.78398	166.1	0.282669	-0.725498
11AM111M-17	0.282641	7.4e-06	0.00828579	3.2e-05	0.0508213	8.1e-05	-4.59736	163.5	0.282671	-1.58769
11AM111M-18	0.282339	8.4e-06	0.00295389	4.6e-05	0.0192918	2.1e-05	-15.2774	428.1	0.282506	-7.32545
11AM111M-19	0.282696	2.3e-05	0.0058061	2.4e-05	0.0304034	3.6e-05	-2.65232	250.2	0.282617	1.97777
11AM111M-21	0.282629	1.6e-05	0.00311771	1.8e-05	0.01619	1.9e-05	-5.02173	375.6	0.282539	1.95488
11AM111M-22	0.282616	6e-06	0.000567787	1.7e-05	0.00459044	2e-05	-5.48147	161.8	0.282672	-2.50382
11AM111M-24	0.282677	9.3e-06	0.0124508	3.6e-05	0.0734179	2.2e-05	-3.32424	163.5	0.282671	-0.314119
11AM111M-25	0.281761	3.9e-05	0.00599218	2.3e-05	0.0342385	1.8e-05	-35.7179	235.4	0.282626	-10.3815
11AM111M-26	0.282501	7.3e-06	0.00666927	1.4e-05	0.040976	1.7e-05	-9.54836	369.3	0.282543	-2.69353
11AM111M-27	0.2826	1.2e-05	0.00374822	1.6e-05	0.0257477	2.6e-05	-6.0473	156.6	0.282675	-3.16685
11AM111M-28	0.28267	9.9e-06	0.0081428	4.7e-05	0.0486301	1.9e-05	-3.57179	172.7	0.282665	-0.390054
11AM111M-31	0.282721	1e-05	0.00400833	3.9e-05	0.0257513	4.3e-05	-1.76822	75.6	0.282725	-0.396556
11AM111M-32	0.282678	1.4e-05	0.0100005	2.5e-05	0.0593398	2.9e-05	-3.28888	179.8	0.28266	0.0255054
11AM111M-33	0.282758	1.6e-05	0.00856788	4.1e-05	0.0581117	2.4e-05	-0.459736	188.7	0.282655	3.02198
11AM111M-34	0.282633	9.8e-06	0.00927347	1.9e-05	0.0539822	2e-05	-4.88027	163.6	0.282671	-1.86883
11AM111M-39	0.282601	9.5e-06	0.0089874	2e-05	0.0563504	1.5e-05	-6.01193	181	0.28266	-2.67621
11AM111M-40	0.282615	9.4e-06	0.0107851	1.8e-05	0.0705985	1.7e-05	-5.51683	181.1	0.28266	-2.17905
11AM111M-41	0.282625	6.6e-06	0.00680635	1.7e-05	0.0417438	3.6e-05	-5.16319	174.8	0.282664	-1.94285
11AM111M-42	0.282642	1.2e-05	0.00722978	3.6e-05	0.0504813	1.9e-05	-4.562	62.2	0.282733	-3.44028
11AM111M-43	0.282646	1e-05	0.0108763	2.3e-05	0.0693986	1.4e-05	-4.42054	176.1	0.282663	-1.17566
11AM111M-44	0.282906	1e-05	0.0040739	1.4e-05	0.027068	1.6e-05	4.77418	241.9	0.282622	9.25299
11AM111M-46	0.282709	8.7e-06	0.00601593	1.6e-05	0.0394156	3.3e-05	-2.19259	176.8	0.282662	1.06622
11AM111M-47	0.282663	9.4e-06	0.0111935	3.3e-05	0.0703101	3.2e-05	-3.81934	170.4	0.282666	-0.680625
11AM111M-50	0.282863	7.7e-06	0.00920222	3.2e-05	0.050327	3.3e-05	3.25352	78.3	0.282723	4.67631
11AM111M-58	0.282605	9.7e-06	0.00196492	1.7e-05	0.0140082	1.9e-05	-5.87047	171.6	0.282666	-2.71012
11AM111M-59	0.28265	9.8e-06	0.00661284	1.1e-05	0.0409268	2.7e-05	-4.27908	179	0.282661	-0.980016
11AM111M-60	0.282664	1.2e-05	0.0101228	2.6e-05	0.0666853	2.1e-05	-3.78398	167.2	0.282668	-0.70497
11AM111M-61	0.282624	8.1e-06	0.0111038	3.9e-05	0.0702012	1.3e-05	-5.19855	172.2	0.282665	-2.02675
11AM111M-62	0.282216	8.6e-06	0.0062721	4e-05	0.0428239	3.4e-05	-19.6272	234.1	0.282627	-15.3068
11AM145M-6	0.282811	1.3e-05	0.00622657	4.6e-05	0.0345417	5e-05	1.41457	72.4	0.282727	2.72712
11AM145M-12	0.282959	8.7e-06	0.00757155	2.1e-05	0.0445921	5.8e-05	6.64849	87.1	0.282718	8.23597
11AM145M-14	0.282721	8.5e-06	0.00597429	2.5e-05	0.0385727	2.6e-05	-1.76822	75.6	0.282725	-0.396556
11AM145M-21	0.282639	6.8e-06	0.0110166	1.5e-05	0.0733563	3.4e-05	-4.66809	167.3	0.282668	-1.58753
11AM145M-23	0.283026	5.5e-06	0.00716387	8.1e-05	0.0479888	1.9e-05	9.0179	82.4	0.282721	10.5181
11AM145M-25	0.282977	8.5e-06	0.00557486	2.1e-05	0.0398923	1.1e-05	7.28505	99.8	0.28271	9.10957
11AM145M-26	0.282717	6.5e-06	0.00426665	3.6e-05	0.0299829	1.3e-05	-1.90967	36.4	0.282749	-1.26789
11AM145M-27	0.282921	9.7e-06	0.00851479	1.9e-05	0.0608759	2.5e-05	5.30465	71.7	0.282728	6.60475
11AM145M-32	0.282993	9.1e-06	0.00857286	2.6e-05	0.0571215	1.7e-05	7.85088	118.5	0.282699	10.0245
11AM145M-33	0.282669	9.3e-06	0.00532404	1.5e-05	0.030674	2.9e-05	-3.60716	70.4	0.282728	-2.33263
11AM145M-35	0.282869	9.2e-06	0.00564625	1.2e-05	0.0358354	2.7e-05	3.4657	88.9	0.282717	5.08615
11AM145M-37	0.282862	1.1e-05	0.00969554	1.9e-05	0.0660533	5.5e-05	3.21815	86.3	0.282719	4.79008
11AM145M-39	0.282665	8.4e-06	0.00724746	4.3e-05	0.0516641	9e-06	-3.74862	160.8	0.282672	-0.789024
11AM145M-62	0.282619	8.7e-06	0.00588083	2.9e-05	0.0380961	3e-05	-5.37537	163.8	0.28267	-2.36038
11AM145M-64	0.282928	1.2e-05	0.0138307	2.4e-05	0.0876315	2.5e-05	5.5522	117.1	0.282699	7.69912
11AM145M-65	0.282624	1e-05	0.00674956	2e-05	0.043805	3.4e-05	-5.19855	161.1	0.282672	-2.23387
11AM145M-72	0.282688	5.7e-06	0.00725301	1.5e-05	0.0471845	1.9e-05	-2.93524	47	0.282743	-2.09627
11AM145M-73	0.283016	1.5e-05	0.00869539	3.2e-05	0.0565047	4.3e-05	8.66425	49.9	0.282741	9.55843
11AM145M-75	0.282983	1e-05	0.010381	4.6e-05	0.0554136	3e-05	7.49723	85.3	0.282719	9.0513
11AM145M-77	0.282956	8.3e-06	0.00665823	2.4e-05	0.0434086	1.2e-05	6.5424	67.9	0.28273	7.77184
11AM145M-78	0.282828	7.5e-06	0.00329265	1.8e-05	0.0211232	2.7e-05	2.01577	82.2	0.282721	3.51104
11AM145M-79	0.283085	6.1e-06	0.00457471	1.4e-05	0.0223457	1.1e-05	11.1044	54.1	0.282738	12.0771
11AM145M-81	0.282266	1e-05	0.00909678	1.6e-05	0.060994	1.4e-05	-17.859	439.3	0.282499	-9.6995
11AM145M-82	0.282903	7.3e-06	0.00531803	3.3e-05	0.0340655	2.1e-05	4.66809	85.8	0.282719	6.23096
11AM145M-85	0.283052	8.1e-06	0.00918851	3.2e-05	0.048945	2.9e-05	9.93737	74.8	0.282726	11.296
11AM145M-86	0.282744	2.5e-05	0.00994579	4.7e-05	0.0541211	2.8e-05	-0.954836	50.9	0.28274	-0.043059
11AM145M-89	0.282903	7.7e-06	0.00566798	2e-05	0.038339	2.8e-05	4.66809	85.3	0.282719	6.22164
11AM145M-90	0.282927	1.3e-05	0.00618913	1.3e-05	0.0378916	3.2e-05	5.51683	72.8	0.282727	6.83747
11AM145M-91	0.282716	9e-06	0.00897027	2.3e-05	0.0593603	4.4e-05	-1.94504	36.1	0.28275	-1.30884
11AM145M-92	0.28284	8.3e-06	0.00437878	1.1e-05	0.0260771	4.1e-05	2.44014	45.9	0.282744	3.25916
11AM145M-93	0.282277	7.6e-06	0.00383409	3.4e-05	0.0255074	3e-05	-17.47	106.7	0.282706	-15.5224
11AM145M-100	0.282942	1.3e-05	0.00573416	4.3e-05	0.0375096	2.7e-05	6.0473	122.7	0.282696	8.29886
11AM145M-101	0.282753	1.1e-05	0.00729797	2.9e-05	0.050209	1.9e-05	-0.636557	86	0.282719	0.92906
